# Supplementary material for: Sequence-Independent DNA Adsorption on Few-Layered Oxygen-Functionalized Graphene Electrodes: An Electrochemical Study for Biosensing Application
Source: MDPI journal article supplement (doi:10.3390/bios11080273), 2021-08-14
Supplement: s1 [file s1]

## Supplementary Information

### **Sequence-Independent DNA Adsorption on Few-Layered Oxygen-Functionalized Graphene Electrodes: An Electrochemical Study for Biosensing Application**

Narges Asefifeyzabadi <sup>1</sup>, Torrey E. Holland <sup>2</sup>, Poopalasingam Sivakumar <sup>2</sup>, Saikat Talapatra <sup>2</sup>,  
Ishani M. Senanayake <sup>1</sup>, Boyd M. Goodson <sup>1</sup> and Mohtashim H. Shamsi <sup>1,\*</sup>

<sup>1</sup> School of Chemical and Biomolecular Sciences, Southern Illinois University, 1245 Lincoln Drive, Carbondale, IL 62918, USA; narges.asefifeyzabadi@siu.edu (N.A.); ishani.senanayake@siu.edu (I.M.S.); bgoodson@chem.siu.edu (B.M.G.)

<sup>2</sup> School of Physics and Applied Physics, Southern Illinois University, Carbondale, IL 62918, USA; tor-rey.holland@siu.edu (T.E.H.); psivakumar@siu.edu (P.S.); saikat@siu.edu (S.T.)

\* Correspondence: mshamsi@siu.edu

**Table S1.** Single-stranded and double-stranded DNA sequences.

| TNR type                 | Single-Stranded Sequence                                                                          | #Repeats |
|--------------------------|---------------------------------------------------------------------------------------------------|----------|
| ssCGG-8                  | 5'-CGG CGG CGG CGG CGG CGG CGG CGG -3'                                                            | 8        |
| ssCCG-8                  | 5'-CCG CCG CCG CCG CCG CCG CCG CCG -3'                                                            | 8        |
| ssGAA-8                  | 5'-GAA GAA GAA GAA GAA GAA GAA GAA -3'                                                            | 8        |
| ssTTC-8                  | 5'-TTC TTC TTC TTC TTC TTC TTC TTC -3'                                                            | 8        |
| ssCTG-8                  | 5'-CTG CTG CTG CTG CTG CTG CTG CTG -3'                                                            | 8        |
| ssCAG-8                  | 5'- CAG CAG CAG CAG CAG CAG CAG CAG -3'                                                           | 8        |
| Double-Stranded Sequence |                                                                                                   |          |
| dsCGG-5                  | 5'-CGG CGG CGG CGG CGG -3'<br>3'- GCC GCC GCC GCC GCC -5'                                         | 5        |
| dsCGG-8                  | 5'-CGG CGG CGG CGG CGG CGG CGG CGG -3'<br>3'- GCC GCC GCC GCC GCC GCC GCC GCC -5'                 | 8        |
| dsCGG-10                 | 5'-CGG CGG CGG CGG CGG CGG CGG CGG CGG CGG -3'<br>3'- GCC -5' | 10       |
| dsCTG-8                  | 5'-CTG CTG CTG CTG CTG CTG CTG CTG -3'<br>3'- GAC GAC GAC GAC GAC GAC GAC GAC -5'                 | 8        |
| dsGAA-8                  | 5'-GAA GAA GAA GAA GAA GAA GAA GAA -3'<br>3'-CTT CTT CTT CTT CTT CTT CTT CTT -5'                  | 8        |

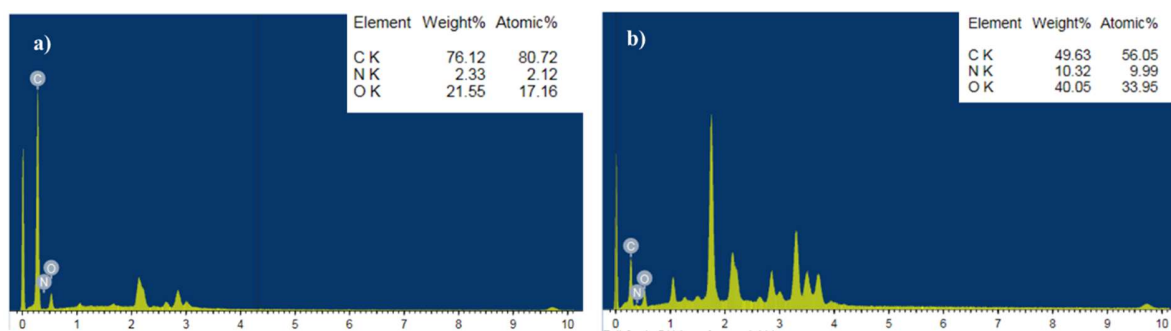**Figure S1.** EDS analysis of printed Gr on ITO a) before and b) after sintering.

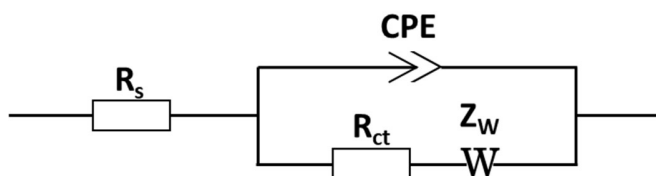

**Figure S2.** Randle's equivalent circuit elements.

**Table S2.** EIS extracted parameters of **Figure 2c**. The average values with standard error of modified Randle's equivalent circuit elements. The errors were calculated for  $N \geq 4$  separate measurements.

|                          | $R_s$<br>$k\Omega$ | $C_{dl}$<br>$\mu F (10^{-2})$ | $R_{ct}$<br>$k\Omega$ | $W$<br>$k\Omega$          |
|--------------------------|--------------------|-------------------------------|-----------------------|---------------------------|
| Bare ITO                 | 0.2 (0.002)        | 99.9 (3.10)                   | 9.5 (0.1)             | $0.005 (1.1) \times 10^8$ |
| GOx/ITO/before sintering | 0.5 (0.020)        | 13.5 (0.50)                   | 246.0 (3.2)           | $8.9 (1.3) \times 10^3$   |
| GOx/ITO/after sintering  | 0.2 (0.001)        | 1680.0 (41.0)                 | 4.2 (0.1)             | $6.3 (6.3) \times 10^1$   |

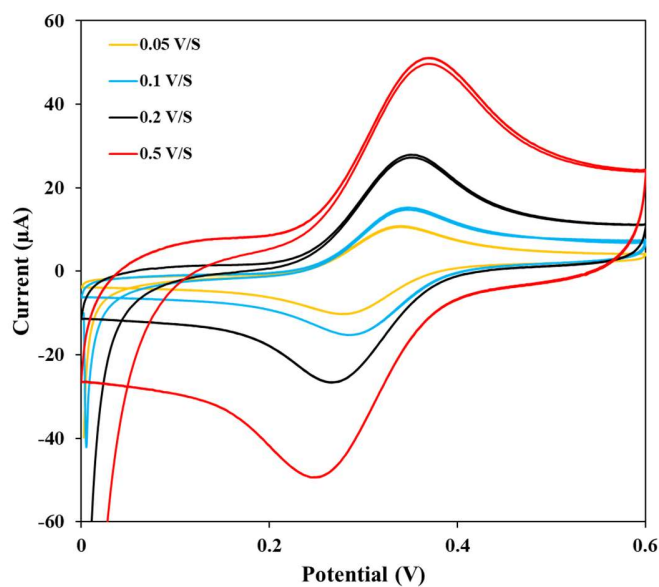

**Figure S3.** CV curves of 10 nM dsCGG-8 at different scan rates.
